WINTER 2017 | VOLUME 29 | NUMBER 1

# The Journal of Neuropsychiatry

## and Clinical Neurosciences

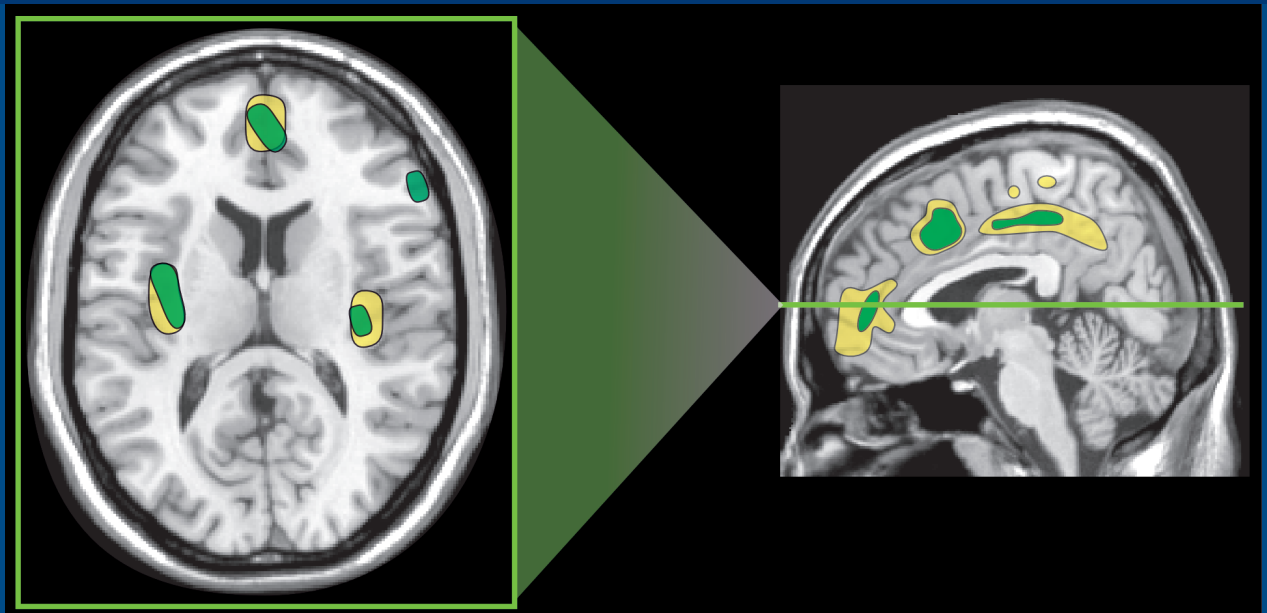

Cognitive Reserve as a Modifier of Clinical Expression in  
Chronic Traumatic Encephalopathy: A Preliminary Examination

Cognitive Effects of Rasagiline in Mild-to-Moderate Stage  
Parkinson's Disease Without Dementia

Microbiome-Gut-Brain Axis: Probiotics and Their  
Association With Depression

The Prevalence of Bipolar Disorders and Association With  
Quality of Life in a Cohort of Patients With Multiple Sclerosis

Cortical Thickness and Anxiety Symptoms Among Cognitively  
Normal Elderly Persons: The Mayo Clinic Study of Aging

Official Journal of the American Neuropsychiatric Association  
[neuro.psychiatryonline.org](http://neuro.psychiatryonline.org)
