# The Journal of Neuropsychiatry and Clinical Neurosciences

Official Journal of the American Neuropsychiatric Association

## Editorial Board

The *Journal of Neuropsychiatry and Clinical Neurosciences* (ISSN 0895-0172), is published quarterly by the American Psychiatric Association (APA), 1000 Wilson Blvd., Suite 1825, Arlington, VA 22209. Copyright © 2017 American Psychiatric Association. The *Journal of Neuropsychiatry and Clinical Neurosciences* is protected by copyright and may not be reproduced in any manner without written permission. The *Journal* is abstracted/indexed in *Chemical Abstracts*, *Current Contents/Clinical Medicine*®, *EMBASE/Excerpta Medica*, *Index Medicus/MEDLINE/MEDLARS*, *PsycINFO*, *Psychological Abstracts*, *Research Alert*®, and *Sci Search*®. It is available through University Microfilms, Inc., 300 North Zeeb Road, Ann Arbor, MI 48106, in microform, electronic, or paper format.

Manuscript submissions should no longer be sent by mail. Please visit <http://mc.manuscriptcentral.com> to upload a paper online.

U.S. individual subscriptions are \$270 per year for 4 issues (\$216 for APA members); international subscriptions are \$408 per year (\$243 for online only). APA International Members receive a 20% discount off the online only rate for an individual online subscription. Institutional subscriptions are tier priced. For institutional site license information and pricing, please email us at [appi@psych.org](mailto:appi@psych.org), call (800) 368-5777 or visit [www.appi.org/ForLibrarians/](http://www.appi.org/ForLibrarians/).

Advertising inquiries may be directed to Tim Wolfinger at PMI, 30 East 33rd St., New York, NY 10016; (212) 904-0379; [twolfinger@pminy.com](mailto:twolfinger@pminy.com).

APA is not responsible for statements made in this publication by contributors or advertisers. Unless stated, material in the *Journal of Neuropsychiatry and Clinical Neurosciences* does not reflect the endorsement, official attitude, or position of APA or the American Neuropsychiatric Association.

Periodicals postage paid at Arlington, VA, and additional mailing offices.  
POSTMASTER: Send address changes to the *Journal of Neuropsychiatry and Clinical Neurosciences*, 1000 Wilson Blvd., Suite 1825, Arlington, VA 22209.

### Editor

David B. Arciniegas, M.D.

### Editor Emeritus

Stuart C. Yudofsky, M.D.

### Deputy Editor

C. Alan Anderson, M.D.

### Assistant to the Editors

T. Angelita Garcia, M.B.A.

### Consulting Editors

C. Edward Coffey, M.D.  
Thomas W. McAllister, M.D.  
Henry Nasrallah, M.D.  
Fred Ovsiew, M.D.  
Jonathan M. Silver, M.D.

### Associate Editors

Sheldon Benjamin, M.D.  
Kevin J. Black, M.D.  
Nashaat N. Boutros, M.D.  
John J. Campbell, M.D.  
Miles Cunningham, M.D.  
Michael Ebert, M.D.  
Richard B. Ferrell, M.D.  
Laura A. Flashman, Ph.D.  
Yonas E. Geda, M.D.  
Daniel I. Kaufman, M.D.  
W. Curt LaFrance, M.D.  
Edward C. Lauterbach, M.D.  
Mario Mendez, M.D., Ph.D.  
Charles Nemeroff, M.D., Ph.D.  
Trevor R. P. Price, M.D.  
Robert G. Robinson, M.D.  
David A. Silbersweig, M.D.  
Robert Stern, Ph.D.  
Kaloyan S. Tanev, M.D.  
Paula T. Trzepacz, M.D.  
Hal S. Wortzel, M.D.

### Neuropsychiatry Classics Editor

Thomas C. Neylan, M.D.

### Book Review Editor

Michael Schrift, D.O., M.A.

### Windows to the Brain Editors

Robin A. Hurley, M.D.  
L. Anne Hayman, M.D.  
Katherine H. Taber, Ph.D.

### American Psychiatric Association Publishing

Rebecca D. Rinehart  
*Publisher*  
Michael Roy  
*Editorial Director, Journals*  
Angela Moore  
*Editorial Manager*  
Susan Westrate  
*Production Manager, Journals*  
Heidi Koch  
*Editorial Support Services Manager*  
Patrick Hansard  
*Director of Marketing and Sales*

AMERICAN  
PSYCHIATRIC  
ASSOCIATION  
PUBLISHING

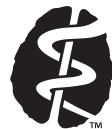

Source: https://psychiatryonline.org/doi/suppl/10.1176/jnp.2017.29.issue-1/suppl_file/ed_board.pdf
